# Supplementary material for: Catalytic polymerization of ε-caprolactone in air
Source: Royal Society of Chemistry journal article supplement (doi:10.1039/c0py00107d), 2010-01-01
Supplement: c0py00107d.pdf [file c0py00107d.pdf]

### Supporting information

$\epsilon$ -Caprolactone was purchased from Fluka and it was distilled  
5 under reduced pressure and stored under argon. D,L- lactide  
was purchased from PURAC biochem (Purasorb DL),  
recrystallized from toluene and stored under argon.  $\text{Ti}(\text{OiPr})_4$   
and  $\text{Ti}(\text{OnBu})_4$  were purchased from Sigma Aldrich and used  
without further purification. Water content of the monomer at  
10 different temperatures was determined with a Metrohm 756  
KF Coulometer.

In the case of  $\epsilon$ -caprolactone polymerizations (runs 1-11),  
the monomer (4-48 ml) was transferred into a 50 ml beaker  
which was placed into a custom made aluminium heating  
15 block. The monomer was preheated 10 minutes at the  
polymerization temperature (70, 100 or 140 °C) followed by  
initiation of polymerization with appropriate amount of tin or  
titanium based catalyst. In the case of D,L- lactide, the  
monomer was first melted in a 50 ml beaker and preheated  
20 10 minutes at 140 °C. After the preheating the catalyst (470  
 $\mu\text{mol}$ ) was added.

Conversions of the monomers were determined by  $^1\text{H}$  NMR  
(Varian Gemini 200 MHz spectrometer) using  $\text{CDCl}_3$  as  
solvent. Molar mass and polydispersity of the polymers were  
25 determined by GPC equipped with a Waters column set  
styragel HR (1,2 and 4) and a Waters 2410 Refractive Index  
Detector. THF was used as an eluent with a flow rate of 0.80  
ml/min at 35 °C. A conventional polystyrene calibration was  
used. Inherent viscosity values were measured with Lauda  
30 PVS instrumentation using  $\text{CHCl}_3$  as solvent. The toxicity  
examinations were carried out at Nelson Laboratories, USA.  
The polymerization system for aseptic production of PCL was  
tested at University of Tampere.
